# Supplementary material for: Electrochemically color tunable poly(N-isopropylacrylamide) microgel-based etalons
Source: Royal Society of Chemistry journal article supplement (doi:10.1039/c4tc00271g), 2014-01-01
Supplement: c4tc00271g1.pdf [file c4tc00271g1.pdf]

## Electronic Supporting Information

### Title: Electrochemically Color Tunable Poly (*N*-Isopropylacrylamide) Microgel-Based Etalons

Wenwen Xu, Yongfeng Gao, Michael J. Serpe\*

Prof. M. J. Serpe, W. Xu, Y. Gao

Department of Chemistry, University of Alberta

Edmonton, Alberta, T6G 2G2, Canada

\*Email: michael.serpe@ualberta.ca

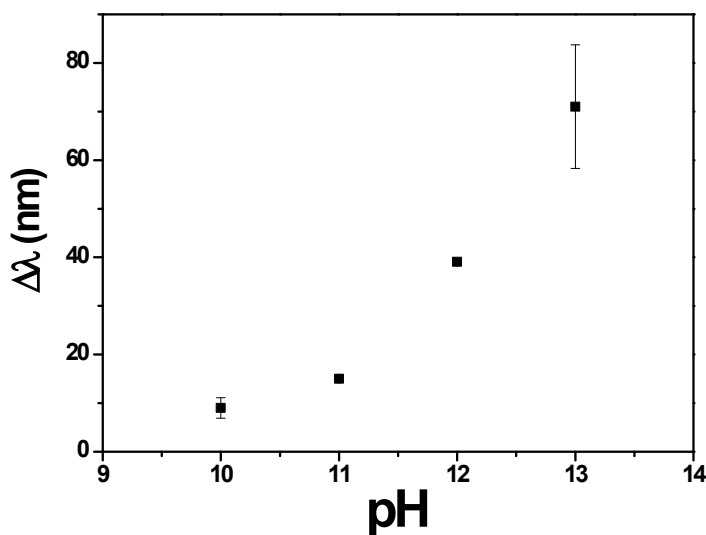

**Figure S1.** Etalon's optical response in different pH environment,  $\Delta\lambda$  is  $\lambda_m - \lambda_{\text{original}}$ , where  $\lambda_m$  is the position of the peak at a given pH (m) and  $\lambda_{\text{original}}$  is the initial position of the peak when the pH=9. Each data point is the average of 3 experiments, with the error bars as the standard deviation.

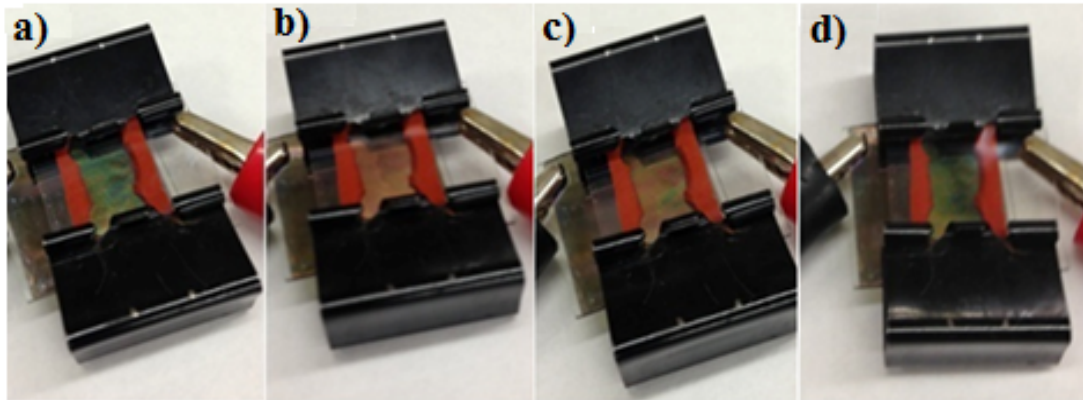

**Figure S2.** Photographs of an etalon at: a) 0 V, b) - 3 V, c) after five days at 0 V after the -3 V in (b), and d) 2 V.

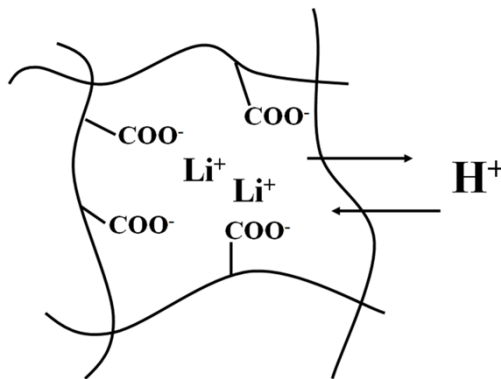

**Figure S3.** Proposed mechanism for color stability. The presence of Li ions makes the protonation of the deprotonated AAc groups difficult, hence the device's color is stable.

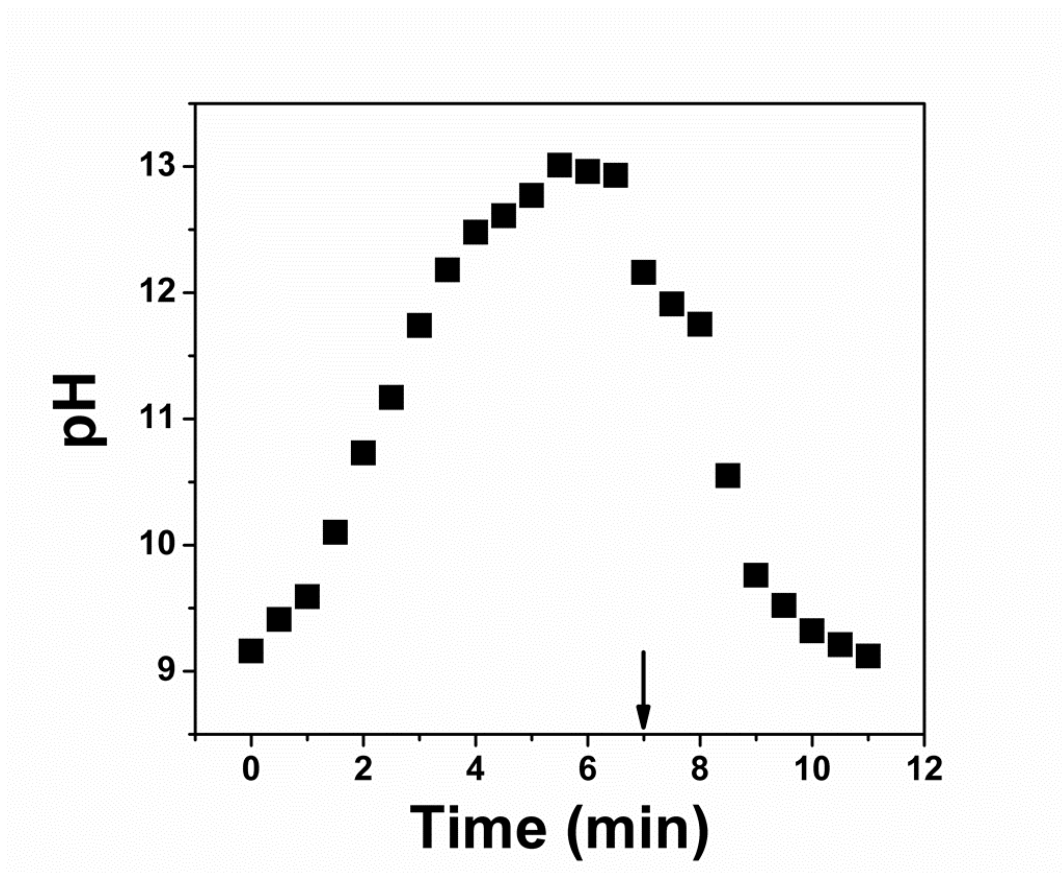

**Figure S4.** -3V is applied across the cell. After 7 min (as the arrow points out), the potential is removed.

**Table S1.** Wavelength shift upon removal of the indicated potentials and overnight stabilization.

| Removed potential (V) | Shift after overnight (nm) |
|-----------------------|----------------------------|
| -2                    | 0.6±0.6                    |
| -2.5                  | 10±7                       |
| -3                    | 70±10                      |
